# Supplementary material
Source: publisher site journal article supplement (https://www.spandidos-publications.com/2242/downloadSupplementary)

Figure S1. Analysis of hnRNP K expression levels in HNSCC based on sample type and other relevant clinicopathological parameters using the UALCAN database. Association of the expression levels of hnRNP K in HNSCC with the (A) sample type (normal is non-cancerous tissue), (B) sex, (C) age, (D) ethnicity, (E) tumor grade, (F) cancer stage, (G) nodal metastasis status and (H) HPV status of patients with HNSCC compared with control patients without HNSCC. \* $P < 0.05$ , \*\* $P < 0.01$ , \*\*\* $P < 0.001$ . hnRNP K, heterogeneous nuclear ribonucleoprotein K; HNSCC, head and neck squamous cell carcinoma; HPV, human papillomavirus; N, node; ns, non-significant.

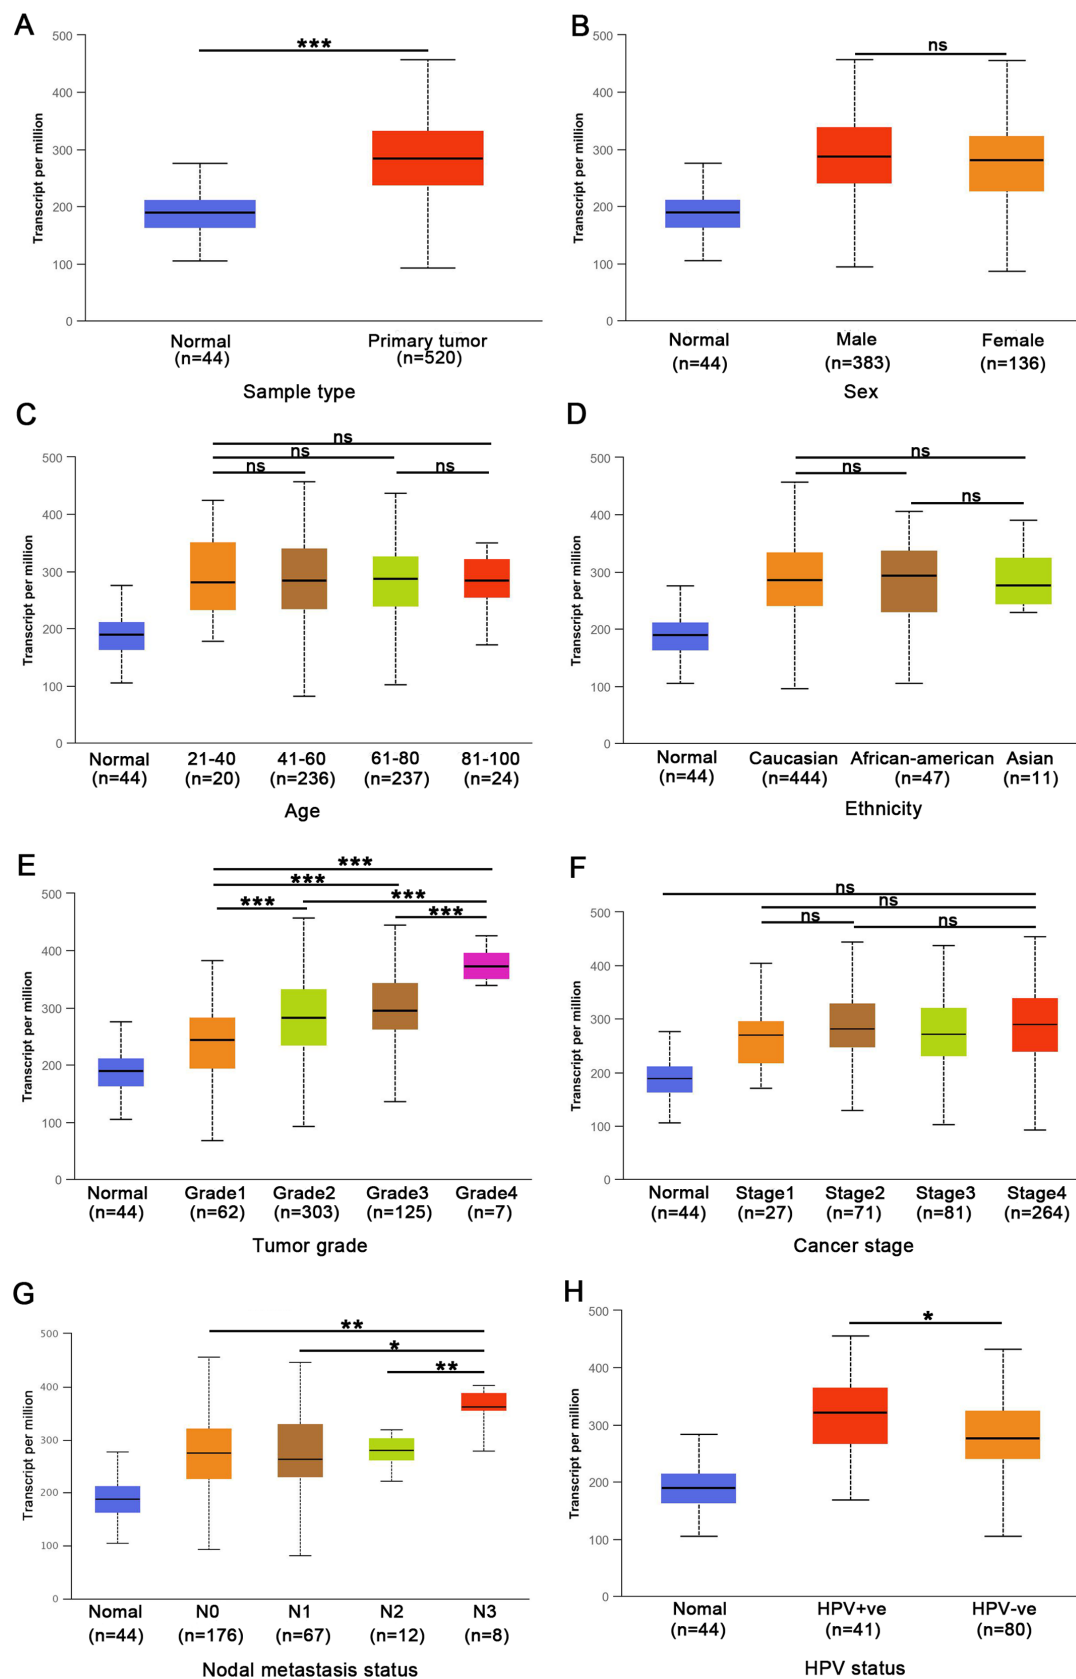

Supplement: Supplementary file 1 [file downloadSupplementary]
